# Supplementary material
Source: PubMed Central journal article supplement (PMC5942556)
Supplement: NIHMS962700-supplement-supplement_1.pdf [file NIHMS962700-supplement-supplement_1.pdf]

## **Applied Microbiology and Biotechnology**

### **Supporting Information for:**

**Identification of cyclosporin C from *Amphichorda felina* using a *Cryptococcus neoformans* differential temperature sensitivity assay**

**Lijian Xu<sup>1,2</sup>, Yan Li<sup>1,3</sup>, John B. Biggins<sup>4</sup>, Brian R. Bowman<sup>4</sup>, and Gregory L. Verdine<sup>4</sup>, James B. Gloer<sup>5</sup>, J. Andrew Alspaugh<sup>6</sup>, Gerald F. Bills<sup>1</sup>**

**<sup>1</sup>Texas Therapeutics Institute, The Brown Foundation Institute of Molecular Medicine, The University of Texas Health Science Center at Houston, Houston, Texas 77054, USA**

**<sup>2</sup>College of Agricultural Resources and Environment, Heilongjiang University, Harbin 150080, China**

**<sup>3</sup>Institute of Vegetables and Flowers, Chinese Academy of Agricultural Sciences, Beijing 100081, China**

**<sup>4</sup>LifeMine Therapeutics, 430 E. 29th Street, Suite 830, New York, New York 10016, USA**

**<sup>5</sup>Department of Chemistry, University of Iowa, Iowa City, Iowa 52242, USA**

**<sup>6</sup>Departments of Biochemistry and Medicine, Duke University Medical Center, Durham, North Carolina 27710, USA**

**Lijian Xu and Yan Li contributed equally to the work.**

### **Corresponding Author:**

**Gerald Bills**

**Texas Therapeutics Institute**

**The Brown Foundation Institute of Molecular Medicine**

**The University of Texas Health Science Center at Houston**

**1881 East Road, 3SCR6.4676**

**Houston, TX 77054, USA**

**Office 01-713-486-2344**

**Mobile 01-713-505-4479**

**billsge@vt.edu or Gerald.F.Bills@uth.tmc.edu**

## Applied Microbiology and Biotechnology

Table S1. Features of the *Amphichorda felina* TTI-0347 draft genome

|                                 |            |
|---------------------------------|------------|
| Predicted genome size (Mbp)     | 32.09      |
| Number of scaffolds             | 30,421     |
| Total size of scaffolds         | 35,697,800 |
| Longest scaffold                | 369,970    |
| Percent GC content              | 54.19      |
| N <sub>50</sub> scaffold length | 107,143    |

## Applied Microbiology and Biotechnology

Table S2. Gene positions, functions, and % identity and similarity of genes shared between the cyclosporin biosynthetic gene clusters of *A. felina* TTI-0347 (NRRL 66746) and *T. inflatum* NRRL 8044.

| No. | Start | End   | name                                   | Coverage | Identity | Similarity |
|-----|-------|-------|----------------------------------------|----------|----------|------------|
| 1   | 2859  | 1     | Hypothetical protein                   | 100%     | 87%      | 91%        |
| 2   | 5050  | 3732  | bZIP transcription factor              | 100%     | 80%      | 83%        |
| 3   | 6927  | 8405  | F-Box domain protein                   | 100%     | 87%      | 90%        |
| 4   | 55043 | 9189  | Cyclosporin synthetase ( <i>simA</i> ) | 100%     | 92%      | 95%        |
| 5   | 55629 | 56862 | Alanine racemase                       | 100%     | 93%      | 97%        |
| 6   | 59728 | 60709 | Cyclophilin                            | 100%     | 93%      | 96%        |
| 7   | 65554 | 61295 | ABC Transporter                        | 97%      | 94%      | 96%        |
| 8   | 66945 | 68201 | Esterase-like protein                  | 100%     | 80%      | 85%        |
| 9   | 70087 | 68327 | Cytochrome b2-like protein             | 95%      | 92%      | 95%        |
| 10  | 79609 | 70770 | PKS                                    | 100%     | 91%      | 94%        |
| 11  | 80999 | 82103 | Hypothetical protein                   | 75%      | 95%      | 97%        |
| 12  | 83899 | 85773 | Cytochrome P450                        | 79%      | 95%      | 98%        |
| 13  | 87537 | 86278 | Aminotransferase                       | 100%     | 92%      | 96%        |

Note: The data is based on the comparison of the amino acid predicted by Augustus (<http://bioinf.uni-greifswald.de/augustus/submission.php>). See Figure 5 for gene numbering. The start and end means the location of start codon and end codon on the biosynthetic gene cluster of *A. felina* TTI-0347.

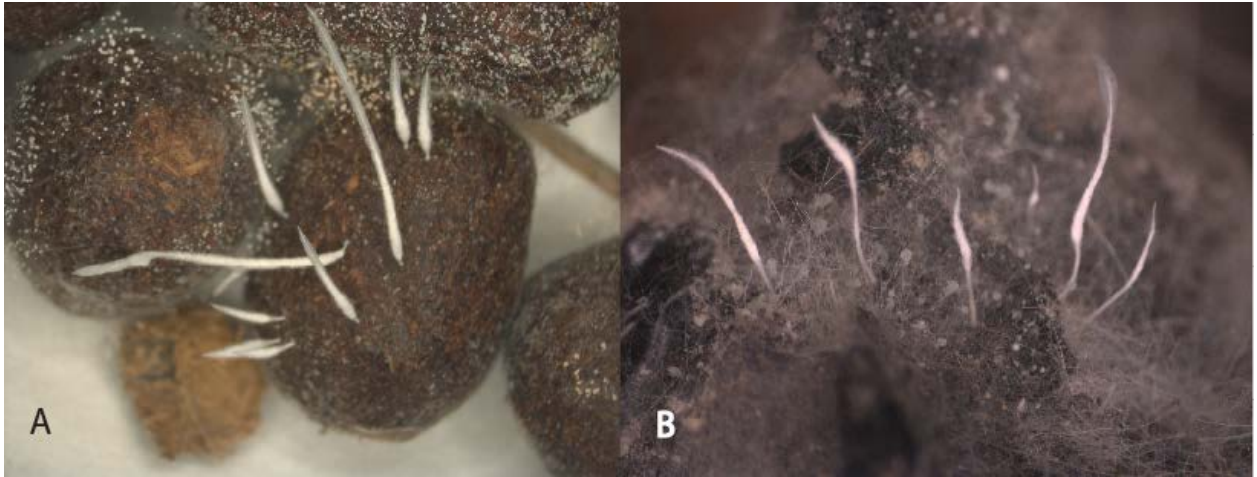

Figure S1. *Amphichorda felina* from Texas. A. Synnemata of *A. felina* TTI-0347 (NRRL 66746) formed on deer dung incubated in a humid chamber. B. Synnemata of *A. felina* TTI-0469 (NRRL 66747) among conidiophores of *Aspergillus clavatus* formed on racoon dung incubated in a humid chamber.

*Cryptococcus neoformans* 25°C

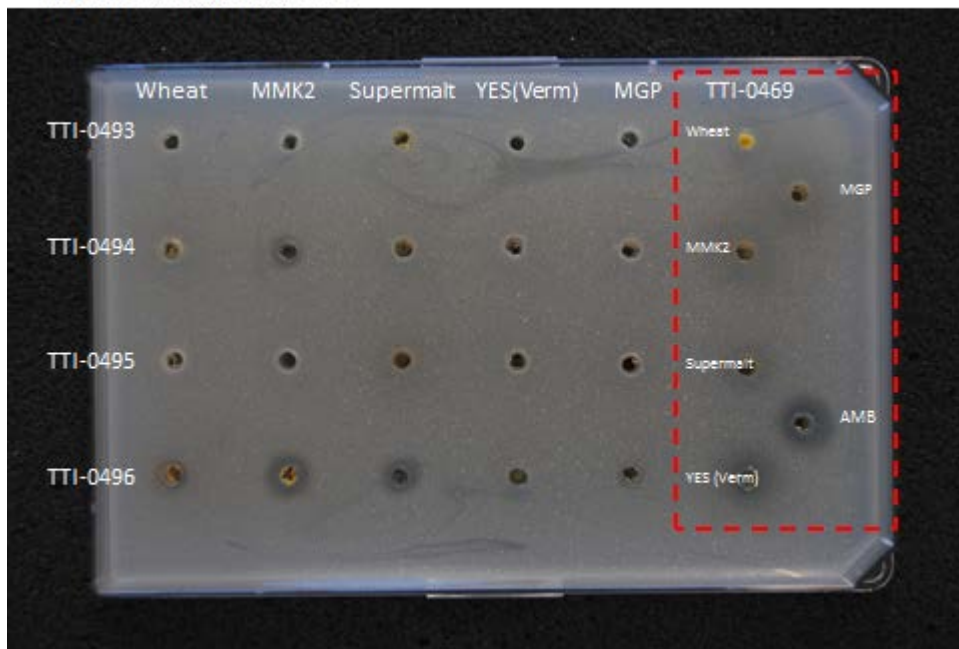

*Cryptococcus neoformans* 37°C

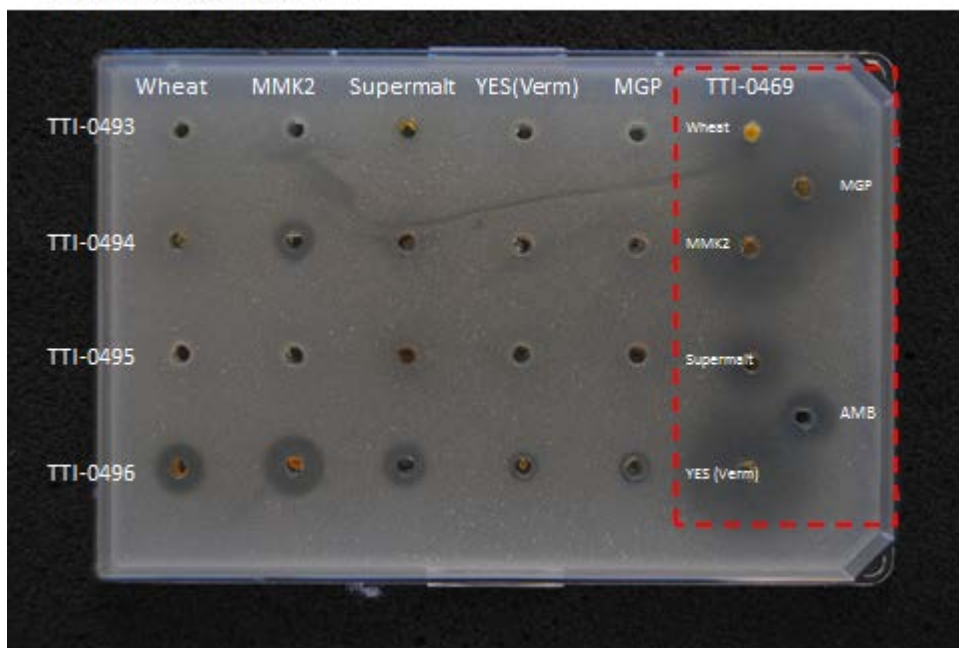

Figure S2. Two-plate temperature assay of MEK extracts of *A. felina* TTI-0469 (NRRL 66746) grown on five media (extracts and amphotericin B control were applied in the wells indicated within red line). Other wells are assays of other fungal extracts.

A)

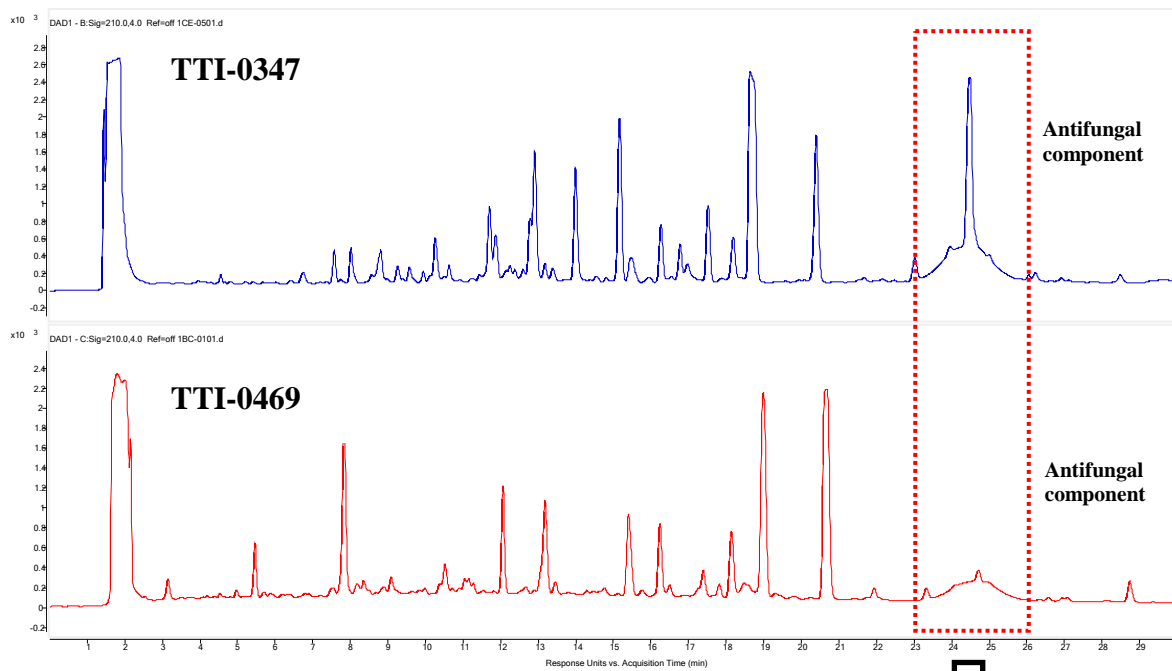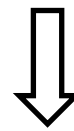

B)

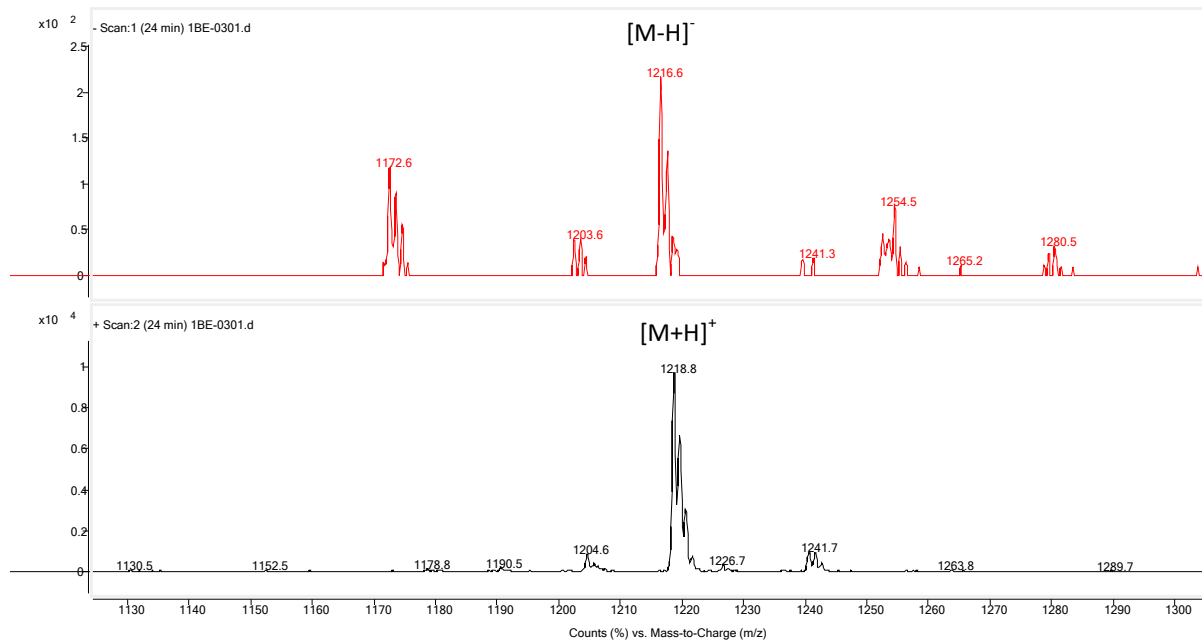

Figure S3. A. LC-MS Bioassay guided identification of the activity component for TTI-0347 and TTI-0469 grown 14 d on MMK2 medium. B. LC-MS spectra of cyclosporin C from TTI-0347.

## Applied Microbiology and Biotechnology

Figure S4.

A)  $^1\text{H}$  NMR spectrum of cyclosporin C (CsC, 500 MHz,  $\text{CDCl}_3$ ) from TTI-0347.

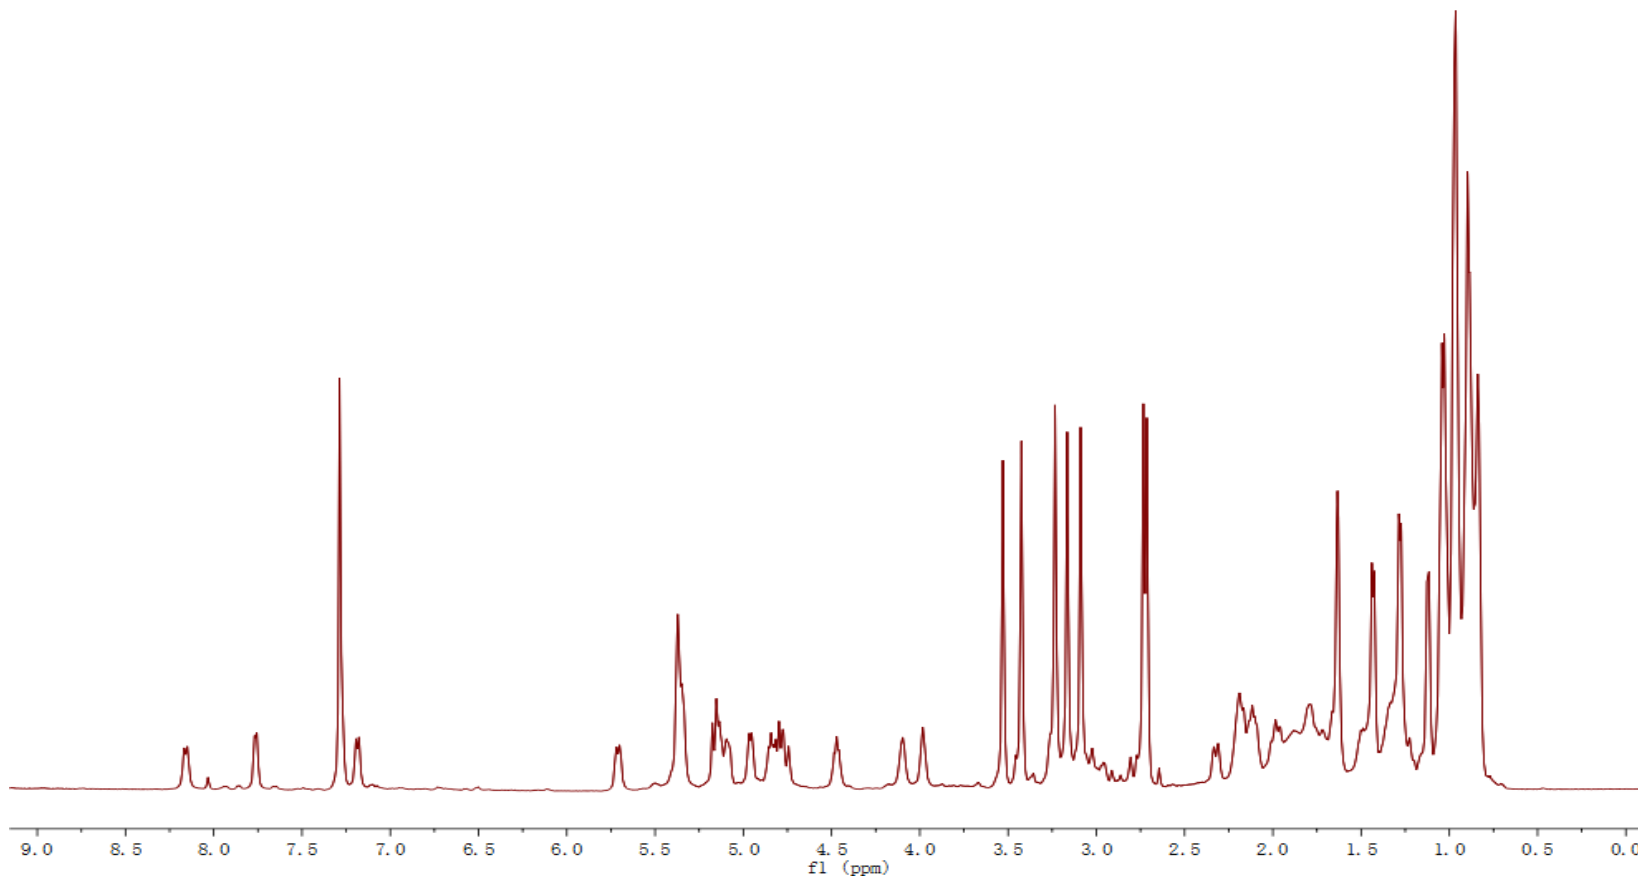

## Applied Microbiology and Biotechnology

B)  $^{13}\text{C}$  NMR spectrum (APT) of cyclosporin C (CsC, 125 MHz,  $\text{CDCl}_3$ ) from TTI-0347.

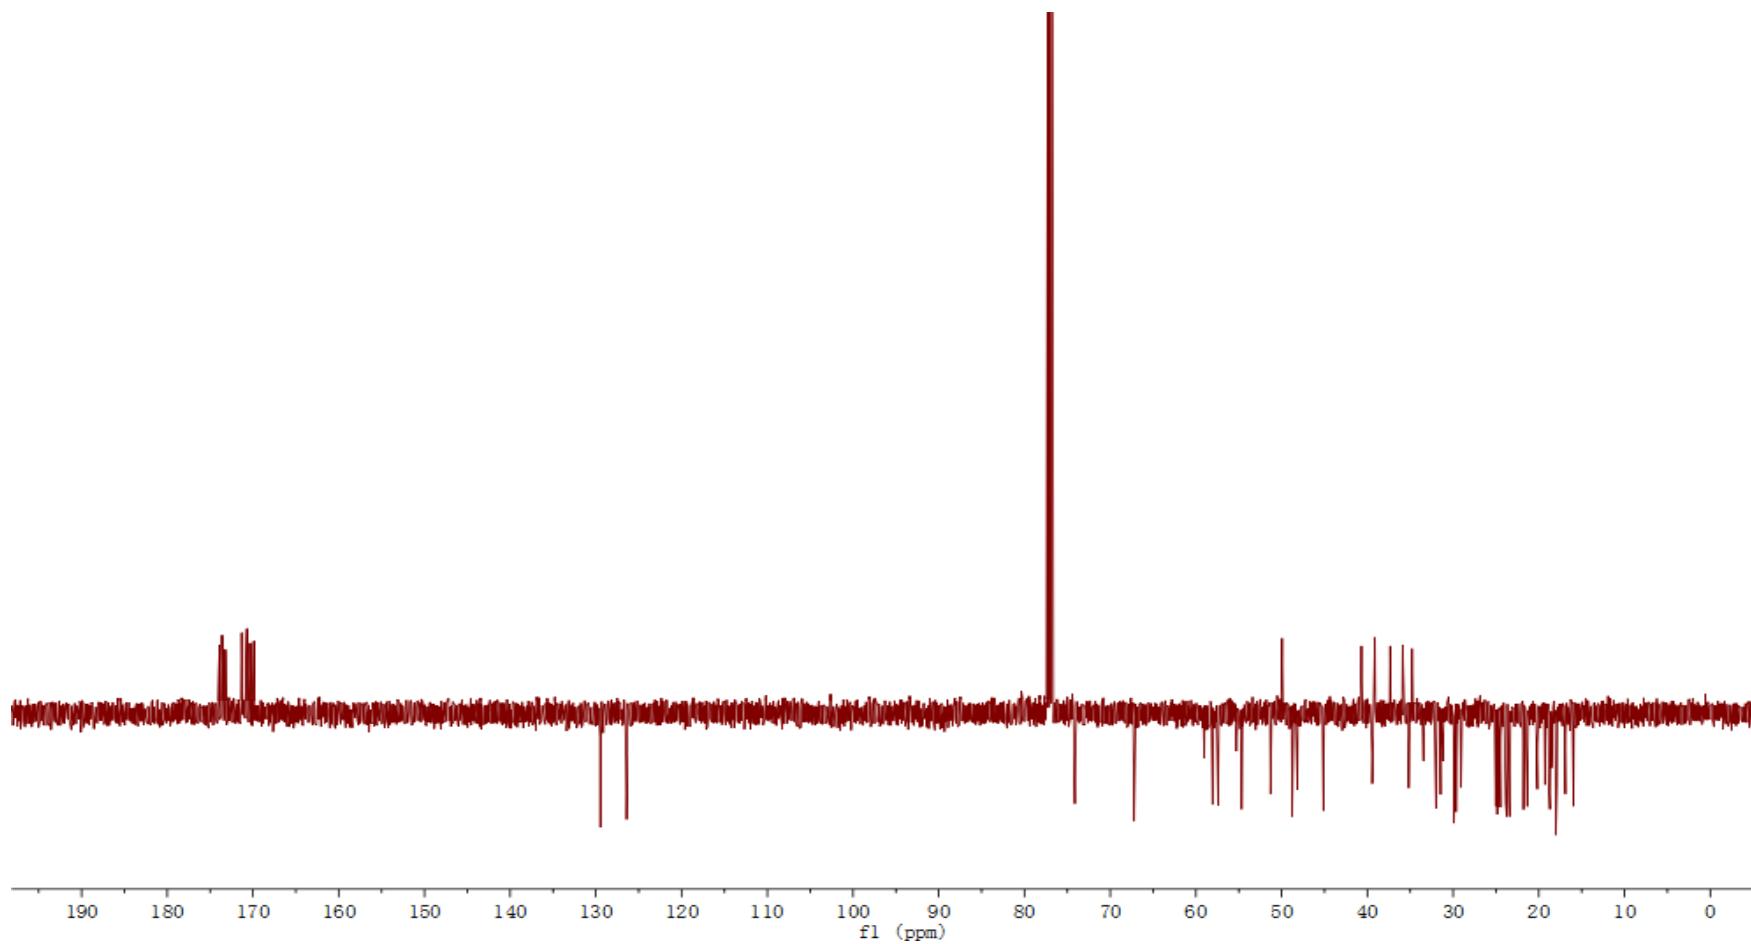



## Applied Microbiology and Biotechnology

C) HRESI mass spectrum of cyclosporin C from TTI-0347.

| ID  | Formula                     | Expected m/z                                                    | Observed m/z                                                   | Accuracy (ppm)   |
|-----|-----------------------------|-----------------------------------------------------------------|----------------------------------------------------------------|------------------|
| CSC | $C_{62}H_{111}N_{11}O_{13}$ | 1218.8436 (M+H <sup>+</sup> )<br>1240.8255 (M+Na <sup>+</sup> ) | 1218.8412(M+H <sup>+</sup> )<br>1240.8223 (M+Na <sup>+</sup> ) | 1.9ppm<br>2.5ppm |

PSF\_CYC #1269 RT: 7.42 AV: 1 NL: 3.27E7  
F: FTMS + p ESI Full ms [200.00-1500.00]

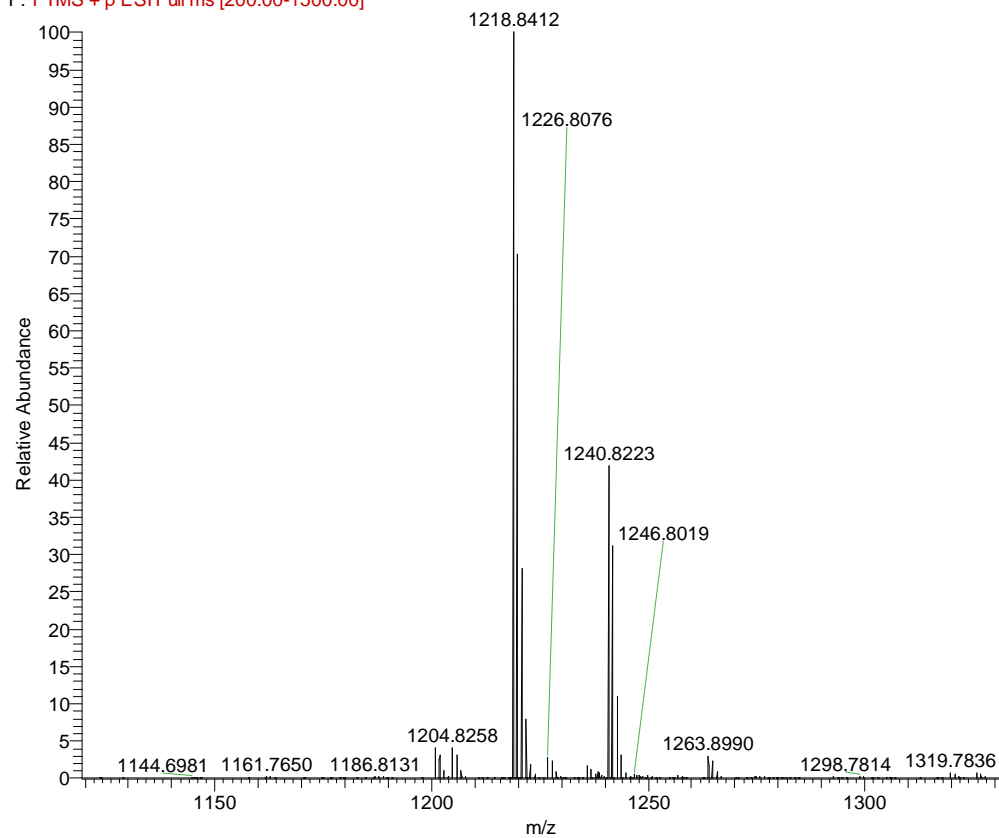

Figure S5.  $^1\text{H}$  NMR spectrum of the commercial cyclosporin C Standard (500 MHz,  $\text{CDCl}_3$ )

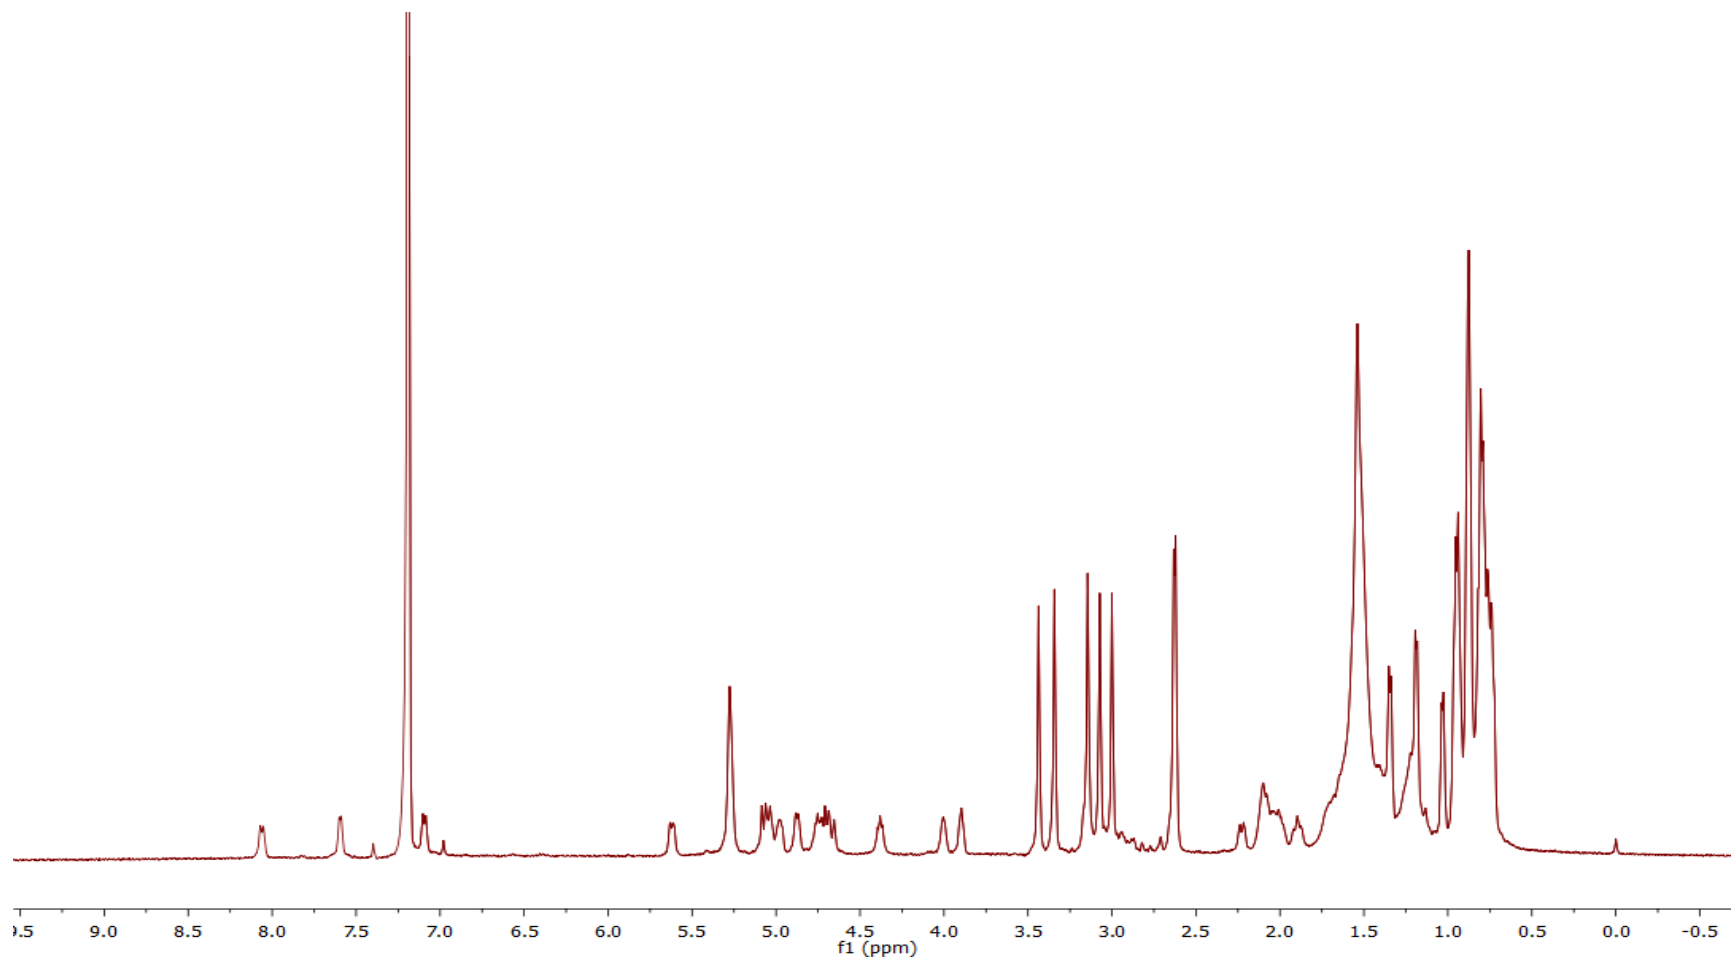

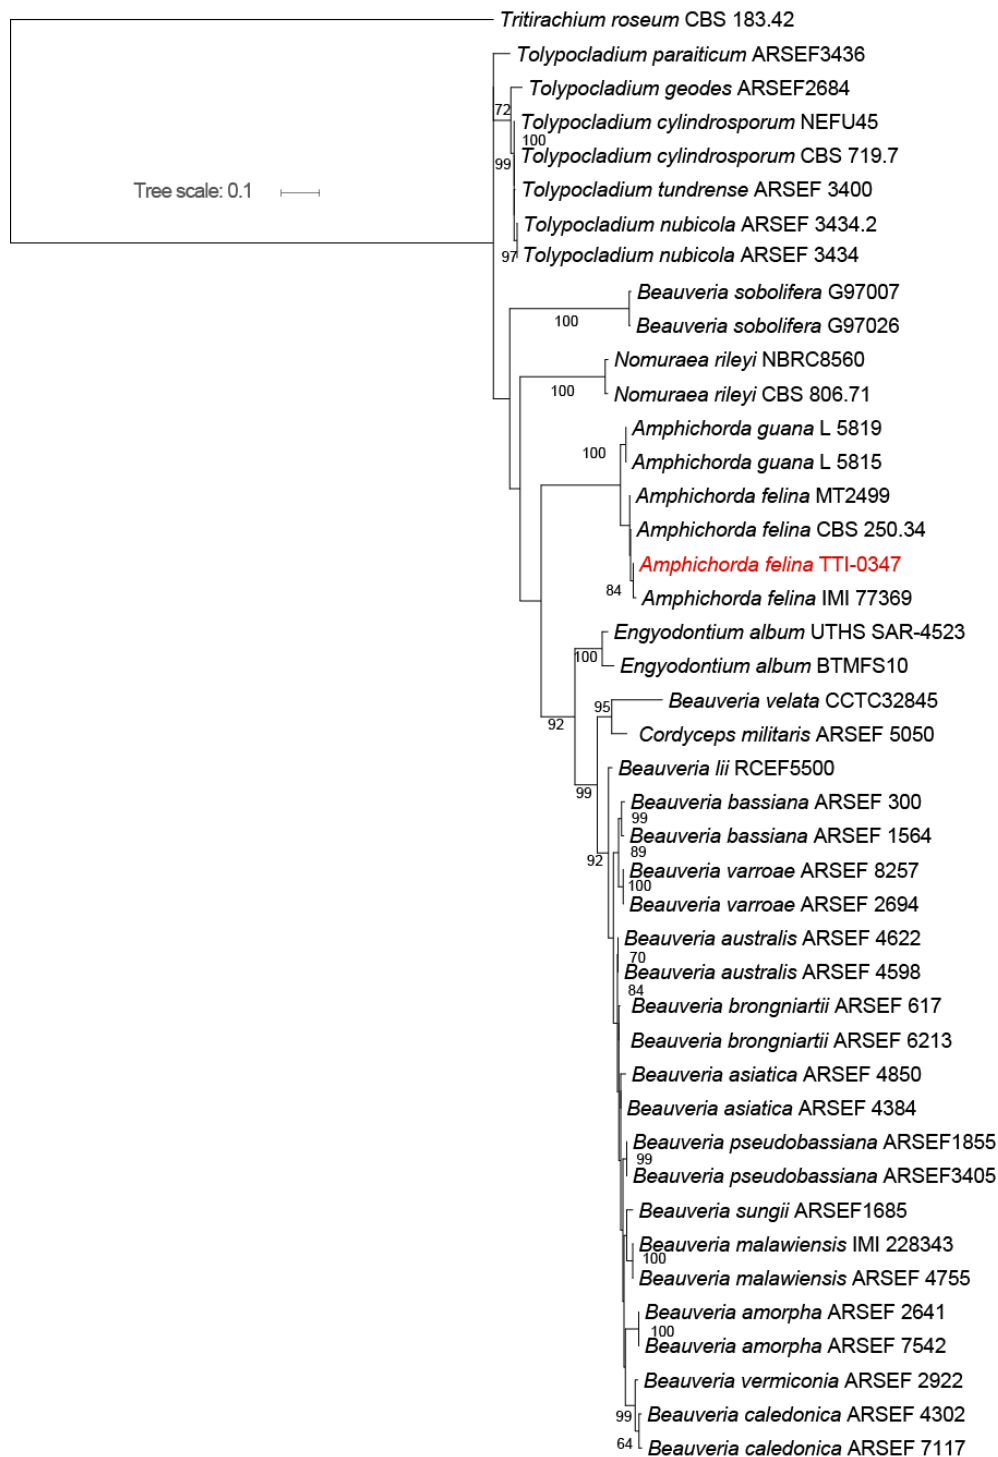

Figure S6. RAxML maximum likelihood tree for ITS rDNA sequences for *Amphichorda* species and related fungi of the Hypocreales. The sequences were aligned with MAFFT and the maximum likelihood tree was built by RAxML 8.2.10 including 1000 bootstrap replicates using a general time-reversible model. Bootstrap values greater than 50% are shown above branches. Sequences were resampled from Zhang ZF, Liu F, Zhou X, Liu XZ, Liu SJ, Cai L. 2017b. Culturable mycobiota from Karst caves in China, with descriptions of 20 new species. Persoonia in press.
